# Supplementary material
Source: PubMed Central journal article supplement (PMC3389968)
Supplement: supp_112.140335_FigureS2.pdf [file supp_112.140335_FigureS2.pdf]

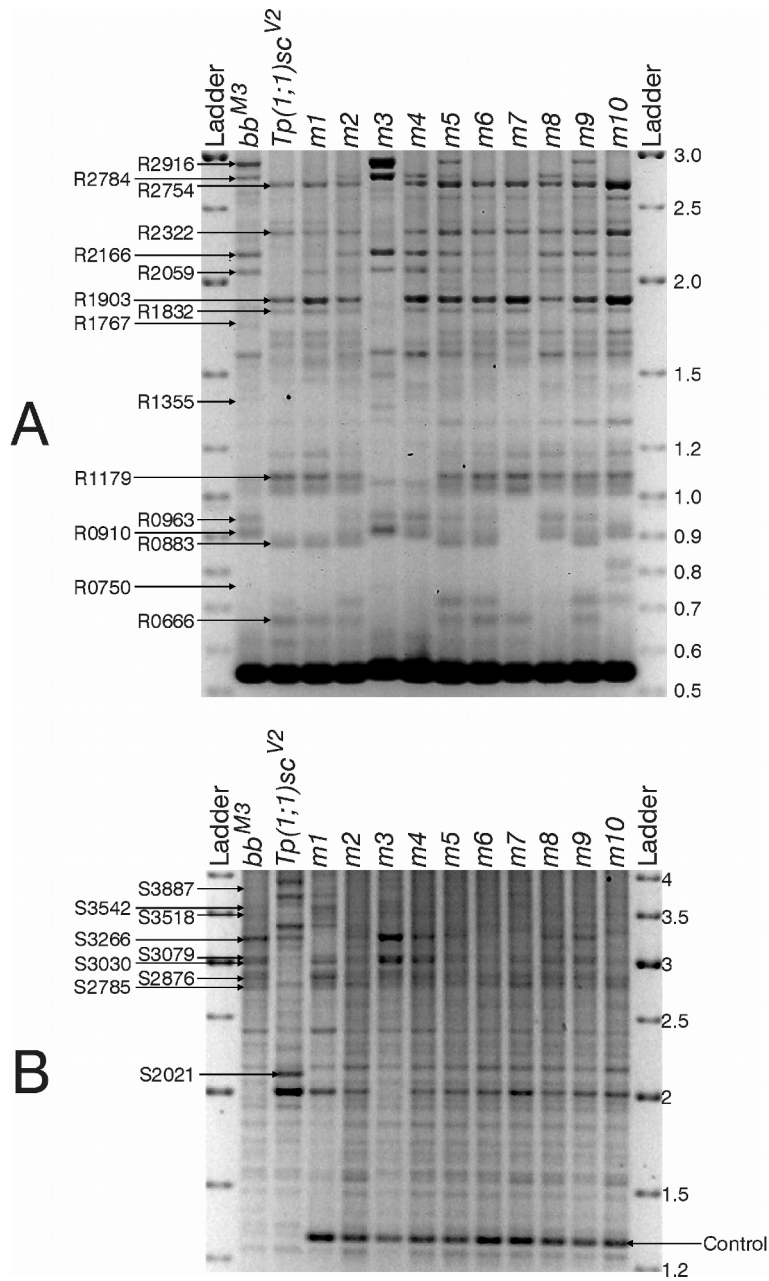

**FIGURE S2 The  $bb^{M3}$  set of minichromosome crossovers:** The ten minichromosomes derived from  $bb^{M3}$  were analyzed in the same gels along with  $bb^{M3}$  and  $Tp(1;1)sc^{V2}$ . (A) PCR amplification using the R2/1 primer pair. (B) PCR amplification using the IGS primer pair. Markers specific to one or the other parental chromosome are indicated. All of the minichromosome samples, but neither  $bb^{M3}$  nor  $Tp(1;1)sc^{V2}$ , contain the 1.25 kb long IGS variant that was used as a quantitative internal control (see text and Figure 10).
