# Supplementary material
Source: PubMed Central journal article supplement (PMC3389968)
Supplement: supp_112.140335_FigureS4.pdf [file supp_112.140335_FigureS4.pdf]

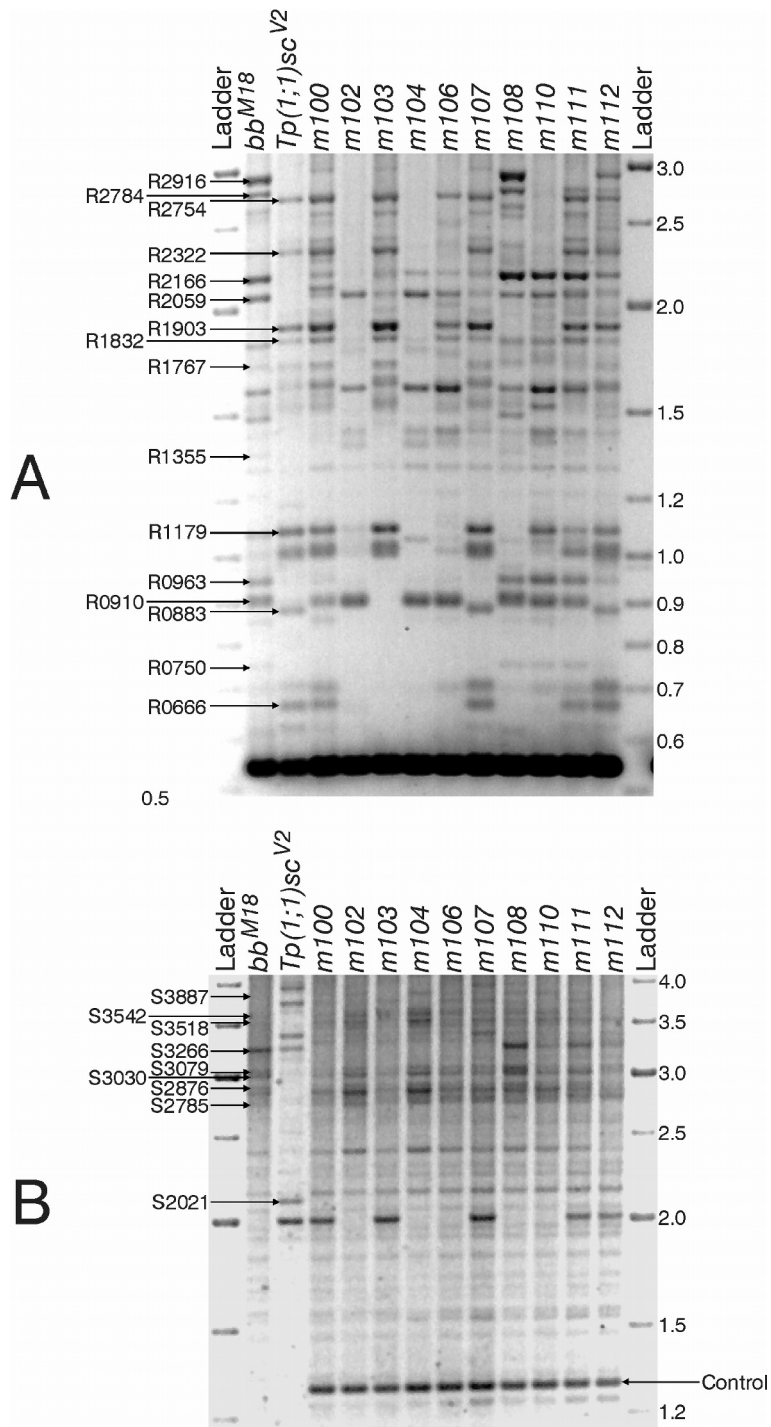

**FIGURE S4 The *bb*<sup>M18</sup> set of minichromosome crossovers:** The ten minichromosomes derived from *bb*<sup>M18</sup> were analyzed in the same gels along with *bb*<sup>M18</sup> and *Tp(1;1)sc*<sup>V2</sup>. (A) PCR amplification using the R2/1 primer pair. (B) PCR amplification using the IGS primer pair. Markers specific to one or the other parental chromosome are indicated. All of the minichromosome samples, but neither *bb*<sup>M18</sup> nor *Tp(1;1)sc*<sup>V2</sup>, contain the 1.25 kb long IGS variant that was used as a quantitative internal control (see text and Figure 10).
