# Supplementary material
Source: PubMed Central journal article supplement (PMC3389968)
Supplement: supp_112.140335_TableS1.pdf [file supp_112.140335_TableS1.pdf]

**TABLE S1 Qualitative crossover data for the *bb*<sup>M1</sup> set of crossover minichromosomes**

| marker | crossover minichromosome: |     |     |     |     |     |     |     |
|--------|---------------------------|-----|-----|-----|-----|-----|-----|-----|
|        | m48                       | m52 | m55 | m49 | m53 | m50 | m56 | m46 |
| R2916  | +                         | +   | +   |     |     |     |     |     |
| R2784  | +                         | +   | +   | +   |     |     |     |     |
| R2166  | +                         | +   | +   | +   | +   | +   | +   | +   |
| R2059  | +                         | +   | +   | +   | +   | +   | +   | +   |
| R1767  | +                         | +   | +   |     |     |     |     |     |
| R1355  | nc                        | nc  | nc  | nc  | nc  | nc  | nc  | nc  |
| R0963  | +                         | +   | +   | +   | Def | +   |     |     |
| R0910  | +                         | +   | +   | +   | +   | +   | +   | +   |
| R0750  | nc                        | nc  | nc  | nc  | nc  | nc  | nc  | nc  |
| S3887  | +                         | +   | +   | +   | +   | +   | +   | +   |
| S3542  | +                         | +   | +   | +   | +   | +   | +   | +   |
| S3518  | +                         | +   | +   | +   | +   | +   | +   | +   |
| S3266  | +                         | +   | +   | +   | +   |     |     |     |
| S3079  | +                         | +   | +   | +   | +   | +   | +   | +   |
| S3030  | +                         | +   | +   | +   | +   | +   | +   | +   |
| S2876  | +                         | +   | +   | +   | +   | +   | +   | +   |
| S2785  | +                         | +   | +   | +   | +   | +   | +   | +   |

The presence of nine R2/1 and eight IGS markers was scored for the *Rex*-magnified *bb*<sup>M1</sup> crossover minichromosome set (Figure S1). The minichromosomes are listed from left to right based on the number of markers carried; minichromosomes produced by more distal exchanges carry more markers than those produced by more proximal exchanges. Two markers were not scorable in this gel and there was one crossover in which an expected marker was absent (see text).

+ = marker present

nc = marker not classifiable

Def = absence of an expected marker in a more-distal exchange
