# Supplementary material
Source: PubMed Central journal article supplement (PMC3389968)
Supplement: supp_112.140335_TableS2.pdf [file supp_112.140335_TableS2.pdf]

**TABLE S2 Qualitative crossover data for the  $bb^{M3}$  set of crossover minichromosomes**

| marker | crossover minichromosome: |    |    |    |    |    |    |     |    |    |
|--------|---------------------------|----|----|----|----|----|----|-----|----|----|
|        | m3                        | m5 | m9 | m4 | m8 | m2 | m6 | m10 | m7 | m1 |
| R2916  | +                         | +  | +  |    |    |    |    |     |    |    |
| R2784  | +                         | +  | +  | +  | +  | +  |    |     |    |    |
| R2166  | +                         | +  | +  | +  | +  | +  | +  | +   | +  |    |
| R2059  | +                         | +  | +  | +  | +  | +  | +  | +   | +  | +  |
| R1767  | +                         |    |    |    |    |    |    |     |    |    |
| R1355  | nc                        | nc | nc | nc | nc | nc | nc | nc  | nc | nc |
| R0963  | +                         | +  | +  | +  | +  | +  | +  | +   |    |    |
| R0910  | +                         | +  | +  | +  | +  | +  | +  | +   |    |    |
| R0750  | nc                        | nc | nc | nc | nc | nc | nc | nc  | nc | nc |
| S3887  | +                         | +  | +  | +  | +  | +  | +  | +   | +  | +  |
| S3542  | +                         | +  | +  | +  | +  | +  | +  | +   | +  | +  |
| S3518  | +                         | +  | +  | +  | +  | +  | +  | +   | +  | +  |
| S3266  | +                         | +  | +  | +  | +  | +  |    |     |    |    |
| S3079  | +                         | +  | +  | +  | +  | +  | +  | +   | +  | +  |
| S3030  | +                         | +  | +  | +  | +  | +  | +  | +   | +  | +  |
| S2876  | +                         | +  | +  | +  | +  | +  | +  | +   | +  | +  |
| S2785  | +                         | +  | +  | +  | +  | +  | +  | +   | +  | +  |

The presence of nine R2/1 and eight IGS markers was scored for the *Rex*-magnified  $bb^{M3}$  crossover set (Figure S2). The minichromosomes are listed from left to right based on the number of markers carried; minichromosomes produced by more distal exchanges carry more markers than those produced by more proximal exchanges. The gel image did not permit scoring two markers.

+ = marker present

nc = marker not classifiable
