# Supplementary material
Source: PubMed Central journal article supplement (PMC3389968)
Supplement: supp_112.140335_TableS3.pdf [file supp_112.140335_TableS3.pdf]

**TABLE S3 Qualitative crossover data for the  $bb^{M4}$  set of crossover minichromosomes**

| marker | crossover minichromosome: |     |     |     |     |     |     |     |
|--------|---------------------------|-----|-----|-----|-----|-----|-----|-----|
|        | m17                       | m20 | m14 | m19 | m21 | m22 | m23 | m16 |
| R2916  | +                         |     |     |     |     |     |     |     |
| R2784  | +                         | +   |     |     |     |     |     |     |
| R2166  | +                         | +   | +   | +   | +   | +   | +   | +   |
| R2059  | +                         | +   | +   | +   | +   | +   | +   | +   |
| R1767  | nc                        | nc  | nc  | nc  | nc  | nc  | nc  | nc  |
| R1355  | +                         | +   | +   |     |     |     |     |     |
| R0963  | +                         | +   | +   | +   | +   | +   | +   |     |
| R0910  | +                         | +   | +   | +   | +   | +   | +   | +   |
| R0750  | +                         | +   | +   | +   | +   |     |     |     |
| S3887  | +                         | +   | +   | +   | +   | +   | +   | +   |
| S3542  | +                         | +   | +   | +   | +   | +   | +   | +   |
| S3518  | +                         | +   | +   | +   | +   | +   | +   | +   |
| S3266  | +                         | +   | +   | +   | +   |     |     |     |
| S3079  | +                         | +   | +   | +   | +   | +   | +   | +   |
| S3030  | +                         | +   | +   | +   | +   | +   | +   | +   |
| S2876  | +                         | +   | +   | +   | +   | +   | +   | +   |
| S2785  | +                         | +   | +   | +   | +   | +   | +   | +   |

The presence of nine R2/1 and eight IGS markers was scored for the *Rex*-magnified  $bb^{M4}$  crossover minichromosome set (Figure S3). The minichromosomes are listed from left to right based on the number of markers carried; minichromosomes produced by more distal exchanges carry more markers than those produced by more proximal exchanges. This gel image did not permit scoring one marker.

+ = marker present

nc = marker not classifiable
