# Supplementary material
Source: PubMed Central journal article supplement (PMC3389968)
Supplement: supp_112.140335_TableS4.pdf [file supp_112.140335_TableS4.pdf]

**TABLE S4 Qualitative crossover data for the  $bb^{M18}$  set of crossover minichromosomes**

| marker | crossover minichromosome: |      |      |      |      |      |      |      |      |      |
|--------|---------------------------|------|------|------|------|------|------|------|------|------|
|        | m108                      | m112 | m111 | m110 | m100 | m104 | m106 | m102 | m103 | m107 |
| R2916  | +                         | +    |      |      |      |      |      |      |      |      |
| R2784  | +                         | +    | +    |      |      |      |      |      |      |      |
| R2166  | +                         | +    | +    | +    | +    | +    | +    | +    | +    | +    |
| R2059  | +                         | +    | +    | +    | +    | +    | +    | +    | +    | +    |
| R1767  | nc                        | nc   | nc   | nc   | nc   | nc   | nc   | nc   | nc   | nc   |
| R1355  | +                         | +    | +    |      |      |      |      |      |      |      |
| R0963  | +                         | +    | +    | +    | +    | +    | +    |      |      |      |
| R0910  | +                         | Def  | +    | +    | +    | +    | +    | +    |      |      |
| R0750  | +                         | +    | +    | +    |      |      |      |      |      |      |
| S3887  | nc                        | nc   | nc   | nc   | nc   | nc   | nc   | nc   | nc   | nc   |
| S3542  | +                         | +    | +    | +    | +    | +    | +    | +    | +    | +    |
| S3518  | +                         | +    | +    | +    | +    | +    | +    | +    | +    | +    |
| S3266  | +                         | +    | +    | +    |      |      |      |      |      |      |
| S3079  | +                         | +    | +    | +    | +    | +    | +    | +    | +    | +    |
| S3030  | +                         | +    | +    | +    | +    | +    | +    | +    | +    | +    |
| S2876  | +                         | +    | +    | +    | +    | +    | +    | +    | +    | +    |
| S2785  | +                         | +    | +    | +    | +    | +    | +    | +    | +    | +    |

The presence of nine R2/1 and eight IGS markers was scored for the  $Ybb^-$ -magnified  $bb^{M18}$  crossover minichromosome set (Figure S4). The minichromosomes are listed from left to right based on the number of markers carried; minichromosomes produced by more distal exchanges carry more markers than those produced by more proximal exchanges. Two markers were unscorable in this gel, and there was one instance of an expected marker being absent (see text).

+ = marker present

nc = marker not classifiable

Def = absence of an expected marker in a more-distal exchange
