# Supplementary material
Source: PubMed Central journal article supplement (PMC3389968)
Supplement: supp_112.140335_TableS5.pdf [file supp_112.140335_TableS5.pdf]

**TABLE S5 Coherence of the order of proximal limits**

| Distal | Proximal | $bb^2$ | $bb^{M1}$ | $bb^{M3}$ | $bb^{M4}$ | $bb^{M18}$ |
|--------|----------|--------|-----------|-----------|-----------|------------|
| R1767  | R2916    | —      | —         | DP        | —         | —          |
|        | R2784    | —      | DP        | DP        | —         | —          |
|        | R1355    | —      | —         | —         | —         | —          |
|        | R0750    | —      | —         | —         | —         | —          |
|        | S3266    | —      | DP        | DP        | —         | —          |
|        | R0963    | DP     | DP        | DP        | —         | —          |
|        | R0910    | DP     | DP        | DP        | —         | —          |
|        | R2166    | DP     | DP        | DP        | —         | —          |
|        | S3542    | DP     | DP        | DP        | —         | —          |
|        | S3079    | DP     | DP        | DP        | —         | —          |
|        | C        | DP     | DP        | DP        | —         | —          |
| R2916  | R2784    | —      | DP        | DP        | DP        | DP         |
|        | R1355    | —      | —         | —         | DP        | DP         |
|        | R0750    | —      | —         | —         | DP        | DP         |
|        | S3266    | —      | DP        | DP        | DP        | DP         |
|        | R0963    | DP     | DP        | DP        | DP        | DP         |
|        | R0910    | DP     | DP        | DP        | DP        | DP         |
|        | R2166    | DP     | DP        | DP        | DP        | —          |
|        | S3542    | DP     | DP        | DP        | DP        | DP         |
|        | S3079    | DP     | DP        | DP        | DP        | DP         |
|        | C        | DP     | DP        | DP        | DP        | DP         |
|        | R2784    | R1355  | —         | —         | —         | DP         |
| R0750  |          | —      | —         | —         | DP        | DP         |
| S3266  |          | —      | DP        | —         | DP        | DP         |

|       |       |    |    |    |    |    |
|-------|-------|----|----|----|----|----|
|       | R0963 | DP | DP | DP | DP | DP |
|       | R0910 | DP | DP | DP | DP | DP |
|       | R2166 | DP | DP | DP | DP | DP |
|       | S3542 | DP | DP | DP | DP | DP |
|       | S3079 | DP | DP | DP | DP | DP |
|       | C     | DP | DP | DP | DP | DP |
| R1355 | R0750 | —  | —  | —  | DP | DP |
|       | S3266 | —  | —  | —  | DP | DP |
|       | R0963 | DP | —  | —  | DP | DP |
|       | R0910 | DP | —  | —  | DP | DP |
|       | R2166 | DP | —  | —  | DP | DP |
|       | S3542 | DP | —  | —  | DP | DP |
|       | S3079 | DP | —  | —  | DP | DP |
|       | C     | DP | —  | —  | DP | DP |
| R0750 | S3266 | —  | —  | —  | —  | —  |
|       | R0963 | DP | —  | —  | DP | DP |
|       | R0910 | DP | —  | —  | DP | DP |
|       | R2166 | DP | —  | —  | DP | DP |
|       | S3542 | DP | —  | —  | DP | DP |
|       | S3079 | DP | —  | —  | DP | DP |
|       | C     | DP | —  | —  | DP | DP |
| S3266 | R0963 | DP | DP | DP | DP | DP |
|       | R0910 | DP | DP | DP | DP | DP |
|       | R2166 | DP | DP | DP | DP | DP |
|       | S3542 | DP | DP | DP | DP | DP |
|       | S3079 | DP | DP | DP | DP | DP |

|       |       |    |    |    |    |    |
|-------|-------|----|----|----|----|----|
|       | C     | DP | DP | DP | DP | DP |
| R0963 | R0910 | DP | DP | —  | DP | DP |
|       | R2166 | DP | DP | DP | DP | DP |
|       | S3542 | DP | DP | DP | DP | DP |
|       | S3079 | DP | DP | DP | DP | DP |
|       | C     | DP | DP | DP | DP | DP |
| R0910 | R2166 | DP | —  | DP | —  | DP |
|       | S3542 | DP | —  | DP | —  | DP |
|       | S3079 | DP | —  | DP | —  | DP |
|       | C     | DP | —  | DP | —  | DP |
| R2166 | S3542 | —  | —  | DP | —  | —  |
|       | S3079 | DP | —  | DP | —  | —  |
|       | C     | DP | —  | DP | —  | —  |
| S3542 | S3079 | DP | —  | —  | —  | —  |
|       | C     | DP | —  | —  | —  | —  |
| S3079 | C     | DP | —  | —  | —  | —  |

The pairwise orders of the proximal limits of all of the markers, listed in the first and the second columns, are compared for the maps of  $bb^2$  (third column) and the magnified alleles (fourth through seventh columns).

D = distal, P = proximal

— = order can not be determined

C = R2059, S3887, S3518, S3030, S2876 and S2785; grouped together because they all have the centromere as their proximal limit in all of the arrays.
