# Supplementary material
Source: PubMed Central journal article supplement (PMC3389968)
Supplement: supp_112.140335_TableS7.pdf [file supp_112.140335_TableS7.pdf]

**Table S7 Semi-quantitative crossover data for the  $bb^{M3}$  set of crossover minichromosomes**

| marker | crossover minichromosome: |    |    |    |    |    |    |     |    |
|--------|---------------------------|----|----|----|----|----|----|-----|----|
|        | m3                        | m5 | m9 | m4 | m8 | m2 | m6 | m10 | m7 |
| R2916  | ++                        | +  | +  |    |    |    |    |     |    |
| R2784  | +++                       | ++ | ++ | ++ | ++ | +  |    |     |    |
| R2166  | +++                       | ++ | ++ | ++ | ++ | ++ | +  | +   | +  |
| R2059  | +                         | +  | +  | +  | +  | +  | +  | +   | +  |
| R1767  | +                         |    |    |    |    |    |    |     |    |
| R1355  | nc                        | nc | nc | nc | nc | nc | nc | nc  | nc |
| R0963  | +++                       | ++ | ++ | ++ | ++ | +  | +  | +   |    |
| R0910  | ++                        | +  | +  | +  | +  | +  | +  | +   |    |
| R0750  | nc                        | nc | nc | nc | nc | nc | nc | nc  | nc |
| S3887  | +                         | +  | +  | +  | +  | +  | +  | +   | +  |
| S3542  | +                         | +  | +  | +  | +  | +  | +  | +   | +  |
| S3518  | +                         | +  | +  | +  | +  | +  | +  | +   | +  |
| S3266  | ++                        | +  | +  | +  | +  | +  |    |     |    |
| S3079  | ++                        | +  | +  | +  | +  | +  | +  | +   | +  |
| S3030  | ++                        | +  | +  | +  | +  | +  | +  | +   | +  |
| S2876  | +                         | +  | +  | +  | +  | +  | +  | +   | +  |
| S2785  | +                         | +  | +  | +  | +  | +  | +  | +   | +  |

The band intensities of the nine R2/1 and eight IGS markers were estimated for the *Rex*-magnified  $bb^{M3}$  crossover minichromosome set (Figure S2). Columns are arranged from left to right, based on decreasing number or intensities of the markers. The gel image did not permit scoring two markers.

+ = marker present

++ = marker distinctly more abundant than +

+++ = marker distinctly more abundant than ++

nc = marker not classifiable in gel
