# Supplementary material
Source: PubMed Central journal article supplement (PMC3389968)
Supplement: supp_112.140335_TableS8.pdf [file supp_112.140335_TableS8.pdf]

**Table S8 Semi-quantitative crossover data for the *bb<sup>M4</sup>* set of crossover minichromosomes**

| marker | crossover minichromosome: |     |     |     |     |     |     |     |
|--------|---------------------------|-----|-----|-----|-----|-----|-----|-----|
|        | m17                       | m20 | m14 | m19 | m21 | m22 | m23 | m15 |
| R2916  | +                         |     |     |     |     |     |     |     |
| R2784  | +                         | +   |     |     |     |     |     |     |
| R2166  | ++                        | ++  | ++  | ++  | ++  | +   | +   | +   |
| R2059  | +                         | +   | +   | +   | +   | +   | +   | +   |
| R1767  | nc                        | nc  | nc  | nc  | nc  | nc  | nc  | nc  |
| R1355  | +                         | +   | +   |     |     |     |     |     |
| R0963  | ++                        | ++  | +   | +   | +   | +   | +   |     |
| R0910  | ++                        | ++  | ++  | ++  | ++  | ++  | ++  | +   |
| R0750  | +                         | +   | +   | +   | +   |     |     |     |
| S3887  | +                         | +   | +   | +   | +   | +   | +   | +   |
| S3542  | +                         | +   | +   | +   | +   | +   | +   | +   |
| S3518  | +                         | +   | +   | +   | +   | +   | +   | +   |
| S3266  | +                         | +   | +   | +   | +   |     |     |     |
| S3079  | +                         | +   | +   | +   | +   | +   | +   | +   |
| S3030  | +                         | +   | +   | +   | +   | +   | +   | +   |
| S2876  | +                         | +   | +   | +   | +   | +   | +   | ++  |
| S2785  | +                         | +   | +   | +   | +   | +   | +   | +   |

The band intensities of the nine R2/1 and eight IGS markers were estimated for the *Rex*-magnified *bb<sup>M4</sup>* crossover minichromosome set (Figure S3). Columns are ordered from left to right based on decreasing number or intensities of the markers. This gel image did not permit scoring one marker.

+ = marker present

++ = marker distinctly more abundant than +

nc = marker not classifiable in gel
