# Supplementary material
Source: PubMed Central journal article supplement (PMC3389968)
Supplement: supp_112.140335_TableS9.pdf [file supp_112.140335_TableS9.pdf]

**Table S9 Semi-quantitative crossover data for the  $bb^{M18}$  set of crossover minichromosomes**

| marker | crossover minichromosome: |      |      |      |      |      |      |      |      |
|--------|---------------------------|------|------|------|------|------|------|------|------|
|        | m108                      | m112 | m111 | m110 | m100 | m104 | m106 | m102 | m103 |
| R2916  | ++                        | +    |      |      |      |      |      |      |      |
| R2784  | ++                        | +    | +    |      |      |      |      |      |      |
| R2166  | +++                       | ++   | ++   | ++   | ++   | +    | +    | +    | +    |
| R2059  | +                         | +    | +    | +    | +    | +    | +    | +    | +    |
| R1767  | nc                        | nc   | nc   | nc   | nc   | nc   | nc   | nc   | nc   |
| R1355  | +                         | +    | +    |      |      |      |      |      |      |
| R0963  | +++                       | +++  | ++   | +    | +    | +    | +    |      |      |
| R0910  | ++                        | Def  | ++   | ++   | ++   | ++   | ++   | +    |      |
| R0750  | +                         | +    | +    | +    |      |      |      |      |      |
| S3887  | nc                        | nc   | nc   | nc   | nc   | nc   | nc   | nc   | nc   |
| S3542  | +                         | +    | +    | +    | +    | +    | +    | +    | +    |
| S3518  | +                         | +    | +    | +    | +    | +    | +    | +    | +    |
| S3266  | ++                        | +    | +    | +    |      |      |      |      |      |
| S3079  | ++                        | +    | +    | +    | +    | +    | +    | +    | +    |
| S3030  | +                         | +    | +    | +    | +    | +    | +    | +    | +    |
| S2876  | +                         | +    | +    | +    | +    | +    | +    | +    | +    |
| S2785  | +                         | +    | +    | +    | +    | +    | +    | +    | +    |

The band intensities of the nine R2/1 and eight IGS markers were estimated for the  $Ybb^-$ -magnified  $bb^{M18}$  crossover minichromosome set (Figure S4). Columns are ordered from left to right based on decreasing number or intensities of the markers. Two markers were unscorable in this gel, and there was one instance of an expected marker being absent (see text).

+ = marker present

++ = marker distinctly more abundant than +

+++ = marker distinctly more abundant than ++

nc = marker not classifiable in gel

Def = absence of an expected marker in a more-distal exchange
