# Supplementary material
Source: PubMed Central journal article supplement (PMC3389968)
Supplement: supp_112.140335_TableS10.pdf [file supp_112.140335_TableS10.pdf]

TABLE S10 Qualitative data for the *Tp(1;1)sc<sup>V2L</sup>* rDNA array

| gel                     | crossover minichromosome: |     |     |     |     |     |     |     |     |    |
|-------------------------|---------------------------|-----|-----|-----|-----|-----|-----|-----|-----|----|
| <i>bb</i> <sup>2</sup>  | m32                       | m31 | m30 | m29 | m25 | m33 | m28 | m24 | m27 |    |
| R2754                   |                           | +   | +   | +   | +   | +   | +   | +   | +   |    |
| R2322                   |                           | +   | +   | +   | +   | +   | +   | +   | +   |    |
| R1903                   |                           | +   | +   | +   | +   | +   | +   | +   | +   |    |
| R1832                   |                           |     |     | +   | +   | +   | +   | +   | +   |    |
| R1179                   |                           |     |     | +   | +   | +   |     | +   | +   |    |
| R0883                   |                           |     |     |     |     |     | +   | +   | +   |    |
| R0666                   |                           |     | +   |     | +   | +   | +   | +   | +   |    |
| S2021                   |                           |     |     | +   | +   | +   | +   | +   | +   |    |
| <i>bb</i> <sup>M1</sup> | m48                       | m52 | m53 | m55 | m46 | m49 | m50 | m56 |     |    |
| R2754                   |                           |     |     |     | +   | +   | +   | +   |     |    |
| R2322                   |                           |     |     |     | +   | +   | +   | +   |     |    |
| R1903                   | +                         | +   | +   | +   | +   | +   | +   | +   |     |    |
| R1832                   | +                         | +   | +   | +   | +   | +   | +   | +   |     |    |
| R1179                   |                           |     |     |     | +   | +   | +   | +   |     |    |
| R0883                   |                           |     |     |     |     | +   | +   | +   |     |    |
| R0666                   |                           |     |     |     |     | +   | +   | +   |     |    |
| S2021                   |                           |     |     |     | +   | +   | +   | +   |     |    |
| <i>bb</i> <sup>M3</sup> | m3                        | m4  | m8  | m10 | m7  | m1  | m2  | m5  | m6  | m9 |
| R2754                   |                           | +   | +   | +   | +   | +   | +   | +   | +   | +  |
| R2322                   |                           | +   | +   | +   | +   | +   | +   | +   | +   | +  |
| R1903                   |                           | +   | +   | +   | +   | +   | +   | +   | +   | +  |
| R1832                   |                           | +   |     | +   | +   | +   | +   | +   | +   | +  |
| R1179                   |                           |     | +   | +   | +   | +   | +   | +   | +   | +  |

|                          |      |      |      |      |      |      |      |      |      |      |    |    |    |
|--------------------------|------|------|------|------|------|------|------|------|------|------|----|----|----|
| R0883                    |      |      |      |      |      |      |      |      | +    | +    | +  | +  | +  |
| R0666                    |      |      |      |      |      |      |      |      | +    | +    | +  | +  | +  |
| S2021                    |      | +    | +    | +    | +    | +    | +    | +    | +    | +    | +  | +  | +  |
| <i>bb</i> <sup>M4</sup>  | m16  | m14  | m20  | m22  | m17  | m19  | m21  | m23  |      |      |    |    |    |
| R2754                    | +    | +    | +    | +    | +    | +    | +    | +    |      |      |    |    |    |
| R2322                    |      | +    | +    | +    | +    | +    | +    | +    |      |      |    |    |    |
| R1903                    | +    | +    | +    | +    | +    | +    | +    | +    |      |      |    |    |    |
| R1832                    | +    | +    | +    | +    | +    | +    | +    | +    |      |      |    |    |    |
| R1179                    |      | +    | +    | +    | +    | +    | +    | +    |      |      |    |    |    |
| R0883                    |      |      |      |      |      |      |      |      | +    | +    | +  | +  |    |
| R0666                    |      |      |      |      |      |      |      |      | +    | +    | +  | +  |    |
| S2021                    |      | +    | +    | +    | +    | +    | +    | +    |      |      |    |    |    |
| <i>bb</i> <sup>M18</sup> | m102 | m104 | m108 | m110 | m106 | m103 | m100 | m111 | m107 | m112 |    |    |    |
| R2754                    |      |      |      |      |      |      |      |      |      |      | +  | +  | +  |
| R2322                    |      |      |      |      |      |      |      |      |      |      | +  | +  | +  |
| R1903                    |      |      |      |      |      |      |      |      |      |      | +  | +  | +  |
| R1832                    |      | +    | +    | +    | +    | +    | +    | +    | +    | +    | +  | +  | +  |
| R1179                    | nc   | nc | nc | nc |
| R0883                    |      |      |      |      |      |      |      |      |      |      |    |    | +  |
| R0666                    |      |      |      |      |      |      |      |      |      |      |    |    | +  |
| S2021                    |      |      |      |      |      |      |      |      |      |      |    |    | +  |

The presence of seven *Tp(1;1)sc*<sup>V2</sup>-specific R2/1 variants (R2754, R2322, R1903, R1832, R1179, R0883, R0666) and of the one *Tp(1;1)sc*<sup>V2</sup>-specific IGS variant (S2021) was scored in the minichromosomes produced by recombination between the *Tp(1;1)sc*<sup>V2</sup> rDNA array and *bb*<sup>2</sup>, three *Rex*-magnified alleles (*bb*<sup>M1</sup>, *bb*<sup>M3</sup> and *bb*<sup>M4</sup>) and the *Ybb*<sup>-</sup>-magnified *bb*<sup>M18</sup> allele. Minichromosome columns are ordered distal to proximal based on the number of *Tp(1;1)sc*<sup>V2</sup>-specific markers; those produced by more proximal exchanges carry more *Tp(1;1)sc*<sup>V2</sup>-specific markers than those produced by more distal exchanges.

+ = marker present

nc = marker not classifiable
